# Supplementary material for: NRF2 plays a protective role in diabetic retinopathy in mice
Source: Springer Nature journal article supplement (doi:10.1007/s00125-013-3093-8), 2013-11-02

**ESM Fig. 3**

*Nrf2*<sup>+/+</sup> non-diabetic

*Nrf2*<sup>+/+</sup> diabetic

*Nrf2*<sup>-/-</sup> non-diabetic

*Nrf2*<sup>-/-</sup> diabetic

GCL  
INL  
ONL

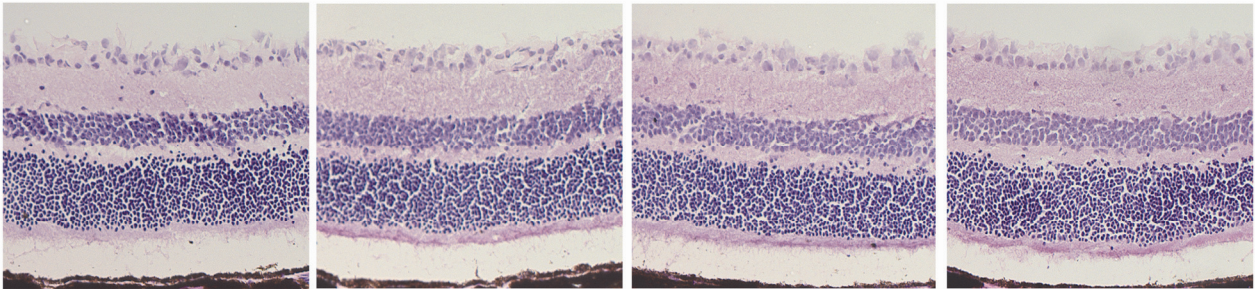

Supplement: 125_2013_3093_MOESM3_ESM.pdf [file 125_2013_3093_MOESM3_ESM.pdf]
