# Supplementary figures and images for: NRF2 plays a protective role in diabetic retinopathy in mice
Source: Springer Nature journal article supplement (doi:10.1007/s00125-013-3093-8), 2013-11-02

**ESM Fig. 1**

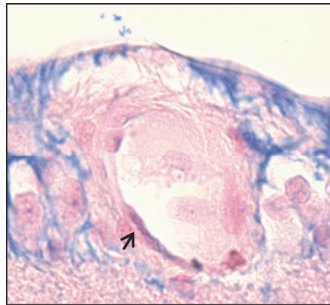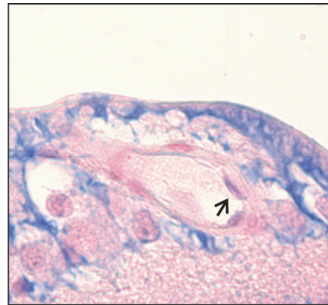

Supplement: 125_2013_3093_MOESM1_ESM.pdf [file 125_2013_3093_MOESM1_ESM.pdf]

**ESM Fig. 2**

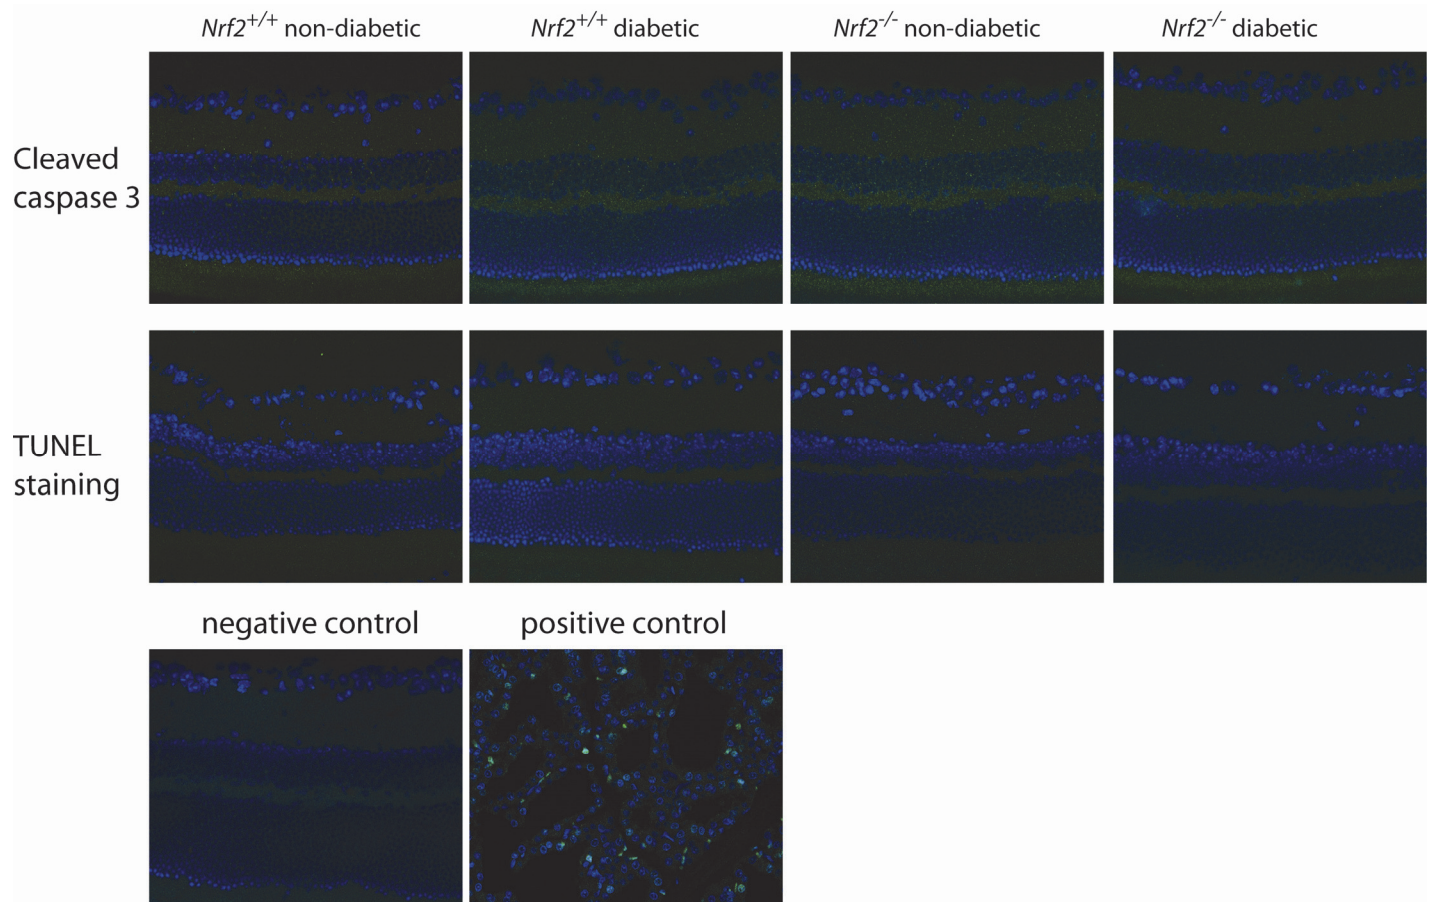

Supplement: 125_2013_3093_MOESM2_ESM.pdf [file 125_2013_3093_MOESM2_ESM.pdf]
